# Supplementary material
Source: publisher figshare collection journal article supplement (https://frontiersin.figshare.com/ndownloader/files/27357725)
Supplement: Supplementary file 1 [file 27357725]

Appendix 1:

**1. Background:**

A) To get a quick overview could you briefly describe your current role and any experiences you have that relate to climate change policy in the agricultural sector?

B) What is your experience of the Nationally Determined Contributions set out under the Paris accord?

a. Would you be able to name any specific objectives you believe to be relevant?

b. Are there any objectives you think should have been included which weren’t?

**2. Identification of institutional barriers**

A) What are the major barriers experienced in the design and drafting or new climate change and agricultural policies in Vietnam? (Hint: Institutional, Informational, Financial, Behavioural/Psychological & Technical)

B) What are the major barriers when implementing climate change and agricultural policies in Vietnam? (Hint: Institutional, Informational, Financial, Behavioural/Psychological & Technical)

C) What are the major barriers faced in monitoring and evaluating the effectiveness of climate change and agricultural policies in Vietnam? (Hint: Institutional, Informational, Financial, Behavioural/Psychological & Technical)

D) If possible, could you describe situations in your work where you have come across these barriers, providing policy specific examples and describing where they occur?

E) How best do you think these challenges can be overcome, using examples and your own experiences wherever possible?
